# Supplementary material for: The nine ADAMs family members serve as potential biomarkers for immune infiltration in pancreatic adenocarcinoma
Source: PubMed Central journal article supplement (PMC7532768; doi:10.7717/peerj.9736), 2020-09-30

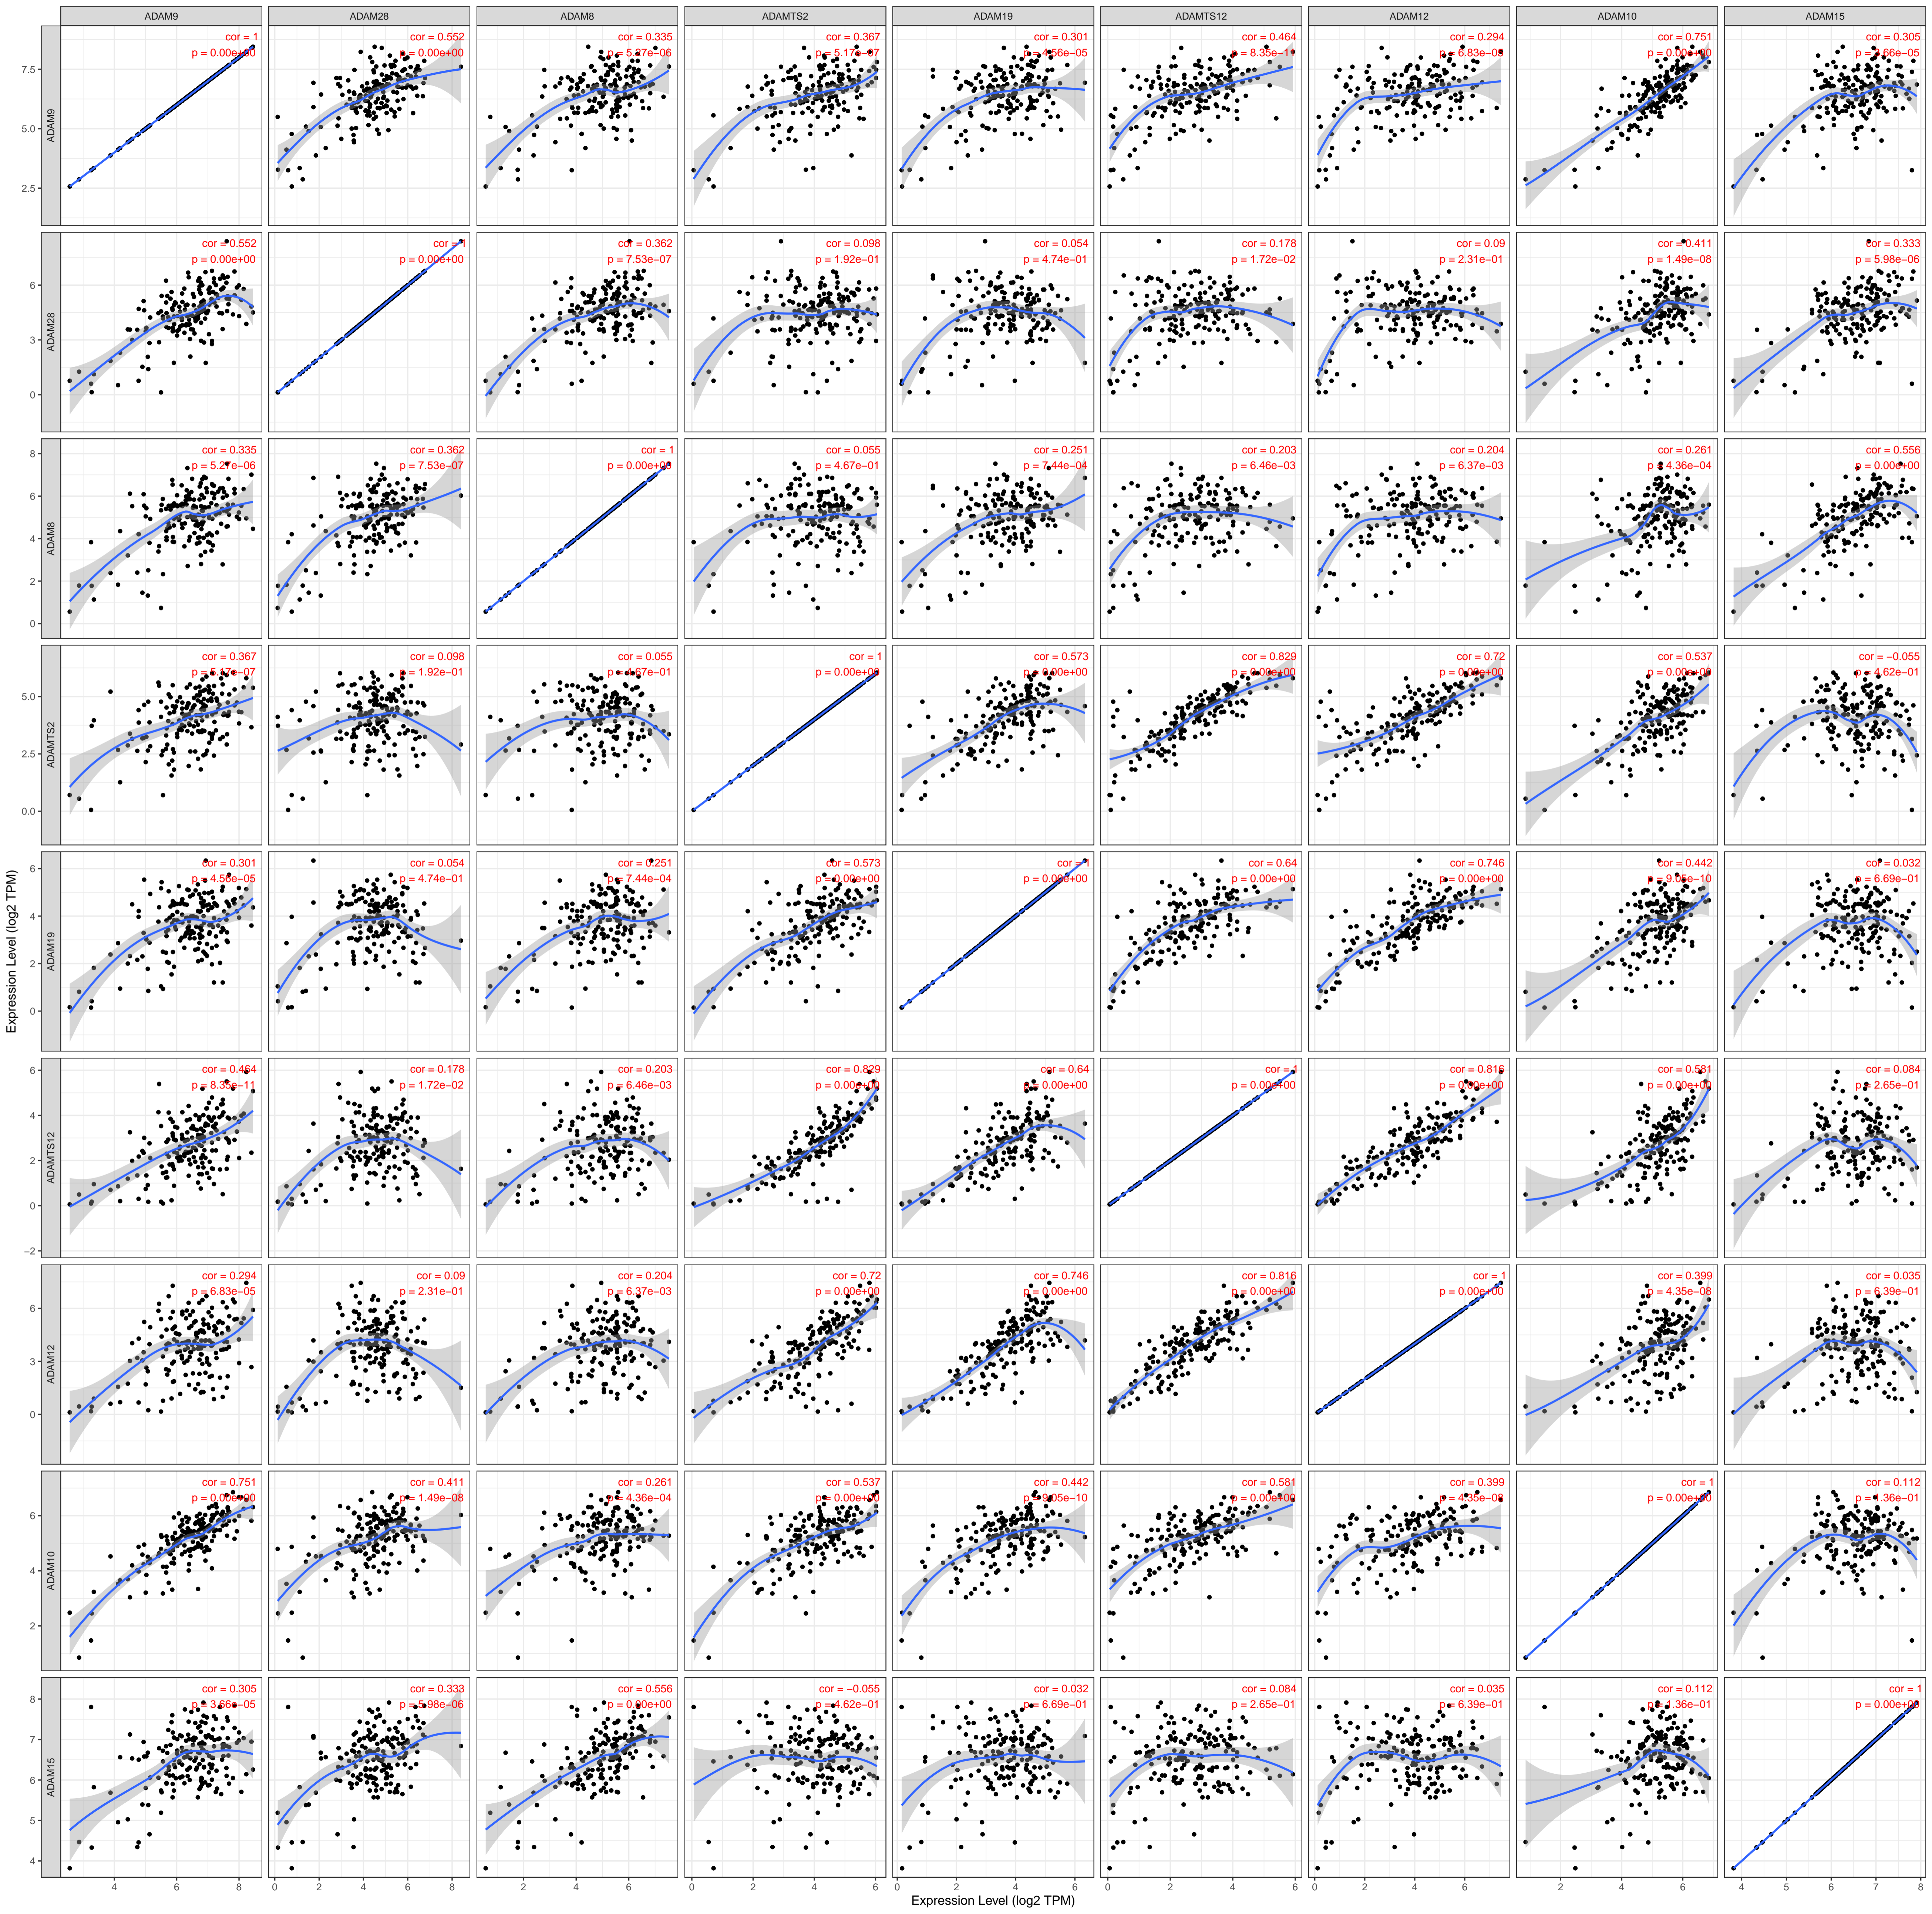

Supplement: peerj-08-9736-s001.pdf [file peerj-08-9736-s001.pdf]
